# Supplementary material for: The early meteorological network of the Societas Meteorologica Palatina (1781–1792): Foundation, organization, reception
Source: Copernicus journal article supplement (doi:10.5194/hgss-2023-7), 2023-05-24
Supplement: Supplementary file [file hgss-2023-7-AC3-supplement.pdf]

|              |                                                                                                                                                                                                                                          |
|--------------|------------------------------------------------------------------------------------------------------------------------------------------------------------------------------------------------------------------------------------------|
| Hemmer       | permission Family Hemmer Horbach                                                                                                                                                                                                         |
| Karl Theo.   | permission of Bayerisches Nationalmuseum for internet available version                                                                                                                                                                  |
| v Stengel    | permission REM Mannheim                                                                                                                                                                                                                  |
| Achard Franz | <a href="https://commons.wikimedia.org/wiki/File:FranzCarlAchard.jpg">https://commons.wikimedia.org/wiki/File:FranzCarlAchard.jpg</a> >100 J                                                                                             |
| Beguelin     | <a href="https://de.wikipedia.org/wiki/Datei:Bugelin.tif">https://de.wikipedia.org/wiki/Datei:Bugelin.tif</a> >100 J                                                                                                                     |
| Bugge        | <a href="https://upload.wikimedia.org/wikipedia/commons/5/54/Thomas_Bugge.jpg">https://upload.wikimedia.org/wikipedia/commons/5/54/Thomas_Bugge.jpg</a><br>Illustreret Dansk Litteraturhistorie bind 2 >100 J                            |
| Calandrelli  | <a href="https://commons.wikimedia.org/wiki/File:Giuseppe_Calandrelli.jpg?uselang=de">https://commons.wikimedia.org/wiki/File:Giuseppe_Calandrelli.jpg?uselang=de</a>                                                                    |
| Chiminello   | permission Museum Specola Padua                                                                                                                                                                                                          |
| Toaldo       | <a href="https://upload.wikimedia.org/wikipedia/commons/6/65/Portret_van_Joseph_Joaldus%2C_RP-P-1909-4754.jpg">https://upload.wikimedia.org/wikipedia/commons/6/65/Portret_van_Joseph_Joaldus%2C_RP-P-1909-4754.jpg</a>                  |
| Euler, A.    | <a href="https://upload.wikimedia.org/wikipedia/commons/f/fc/Johann_Albert_Euler.jpg">https://upload.wikimedia.org/wikipedia/commons/f/fc/Johann_Albert_Euler.jpg</a>                                                                    |
| Steiglehner  | permission Hist. Museum Regensburg Dr. Preischl (requested)                                                                                                                                                                              |
| Hermann FB.  | <a href="https://upload.wikimedia.org/wikipedia/commons/8/8a/B._F._J._Hermann_portrait_by_Fritsch.jpg">https://upload.wikimedia.org/wikipedia/commons/8/8a/B. F. J. Hermann portrait by Fritsch.jpg</a>                                  |
| Gatterer     | <a href="https://upload.wikimedia.org/wikipedia/commons/5/5b/Gotthelf_engelhard_3.JPG">https://upload.wikimedia.org/wikipedia/commons/5/5b/Gotthelf_engelhard_3.JPG</a>                                                                  |
| Huepbauer    | Bock, 1802                                                                                                                                                                                                                               |
| Imhof        | Bock, 1802                                                                                                                                                                                                                               |
| Mann Th.     | Collart Academy Brussels                                                                                                                                                                                                                 |
| Maret Dijo   | <a href="https://upload.wikimedia.org/wikipedia/commons/a/a2/Maret%2C_duc_de_Bassano.jpg">https://upload.wikimedia.org/wikipedia/commons/a/a2/Maret%2C_duc_de_Bassano.jpg</a>                                                            |
| Pictet       | <a href="https://upload.wikimedia.org/wikipedia/commons/3/30/Marc-Auguste_Pictet_-_1752-1825.jpg">https://upload.wikimedia.org/wikipedia/commons/3/30/Marc-Auguste_Pictet_-_1752-1825.jpg</a>                                            |
| Seignette    | <a href="https://upload.wikimedia.org/wikipedia/commons/6/64/Pierre-Henri_Seignette.png">https://upload.wikimedia.org/wikipedia/commons/6/64/Pierre-Henri_Seignette.png</a>                                                              |
| Senebier     | <a href="https://upload.wikimedia.org/wikipedia/commons/0/0b/Jean_Senebier.jpg">https://upload.wikimedia.org/wikipedia/commons/0/0b/Jean_Senebier.jpg</a>                                                                                |
| v. de Perre  | permission academie Zeeuws Museum, collection KZGW, inv. no. G1628. Photographer: Ivo Wennekes.                                                                                                                                          |
| v. Swinden   | <a href="https://upload.wikimedia.org/wikipedia/commons/f/f3/Swinden.jpg">https://upload.wikimedia.org/wikipedia/commons/f/f3/Swinden.jpg</a>                                                                                            |
| Vianelli     | Credit: Giuseppe Valentino Vianelli. Line engraving by I. Rosaspina after A.F. Adrien. <a href="#">Wellcome Collection. Public Domain Mark</a>                                                                                           |
| S. Williams  | permission Haverhill Public Library's Special Collections                                                                                                                                                                                |
| Wilse        | <a href="https://upload.wikimedia.org/wikipedia/commons/0/0a/Jacob_Nicolai_Wilse_%281971_6X6_KBJ_%29.jpg">https://upload.wikimedia.org/wikipedia/commons/0/0a/Jacob_Nicolai_Wilse_%281971_6X6_KBJ_%29.jpg</a> or Digital Museum Norwegen |
| H. Schwaiger | Pröpstetafel Rottenbuch; photo P. Winkler                                                                                                                                                                                                |
| Schwaiger    | Met Obs HP photo P. Winkler                                                                                                                                                                                                              |
| Karner       | Schatzkammer HP photo St. Gilge                                                                                                                                                                                                          |
| Heinrich     | permission University Regensburg                                                                                                                                                                                                         |
| Fig. 9-left  | free use of digitally available version provided by Bav. States Library                                                                                                                                                                  |
